# Supplementary material
Source: publisher site journal article supplement (https://www.dovepress.com/article/293728)
Supplement: Supplementary file 1 [file get_supplementary_file.php]

Supplementary Figure 1

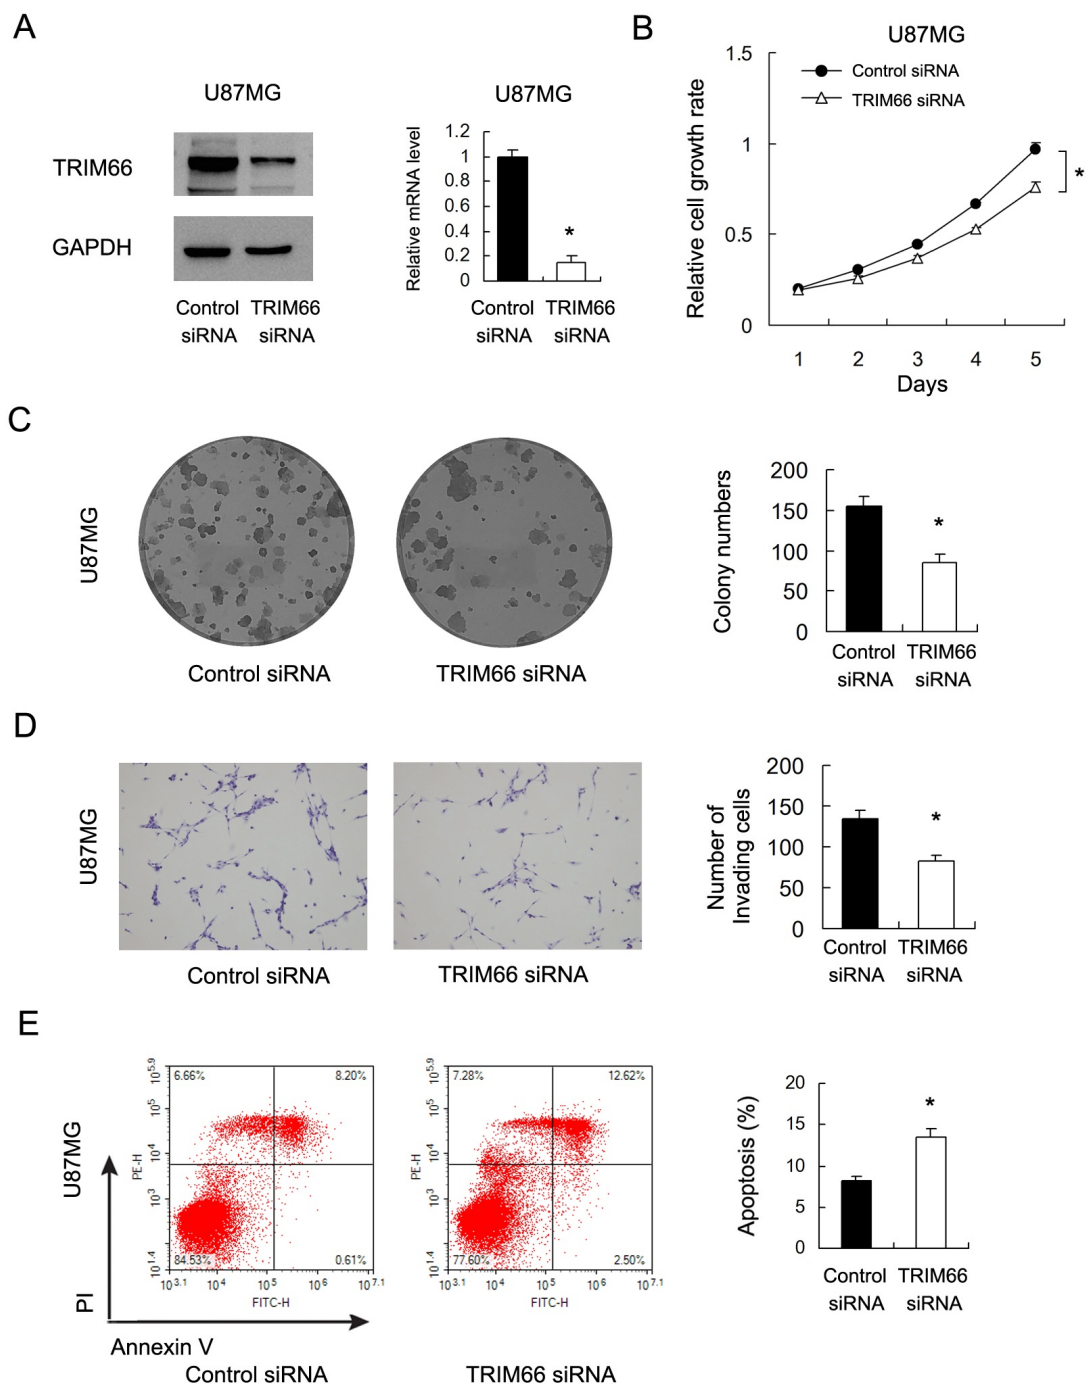

**Supplementary Figure 1. TRIM66 regulates proliferation, invasion and apoptosis in U87MG glioma cell line**

A. Western blot and RT-qPCR showed that siRNA knockdown decreased TRIM66 protein in U87MG cell line. B. CCK8 assay results showed TRIM66 knockdown decreased cellular growth rate in U87MG cell line. C. Colony formation assay results showed TRIM66 knockdown decreased colony numbers in U87MG cell line. D. TRIM66 depletion decreased the numbers of invading number in U87MG cell line. E. TRIM66 knockdown also increased apoptosis rate in U87MG cell line. \*  $p < 0.05$

Supplementary Figure 2

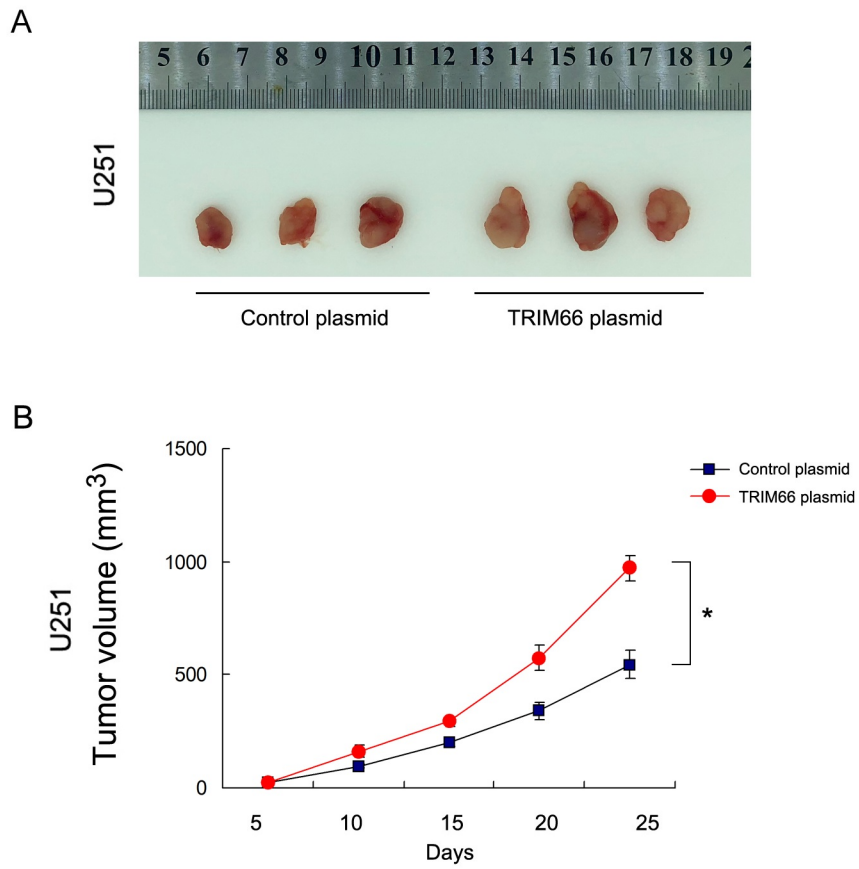

**Supplementary Figure 2. TRIM66 promotes U251 cell growth in vivo**

U251 were stably transfected with TRIM66 plasmid. 5 million cells were injected into nude mice. Representative images of tumors (A) and growth curve (B) were shown.

\* $p < 0.05$
